# Supplementary material for: Potentially Toxic Elements in Invasive Fish Species Prussian Carp (Carassius Gibelio) from Different Freshwater Ecosystems and Human Exposure Assessment
Source: Research Square preprint supplement (doi:10.21203/rs.3.rs-851568/v1), 2021-09-14
Supplement: Supplementary file 1 [file 06de7e55ec10b851c991bef7.docx]

|  | **T (C°)** | **pH** | **EC (µS)** | **DO**  (**mg l-1)** | **DO%** | **BOD** (**mg l-1)** | **NO3-N** (**mg l-1)** | **NH4-N** (**mg l-1)** | **PO4**  (**mg l-1)** | **N-TOT** (**mg l-1)** | **P-TOT** (**mg l-1)** |
| --- | --- | --- | --- | --- | --- | --- | --- | --- | --- | --- | --- |
| **IP1** | 19.93 | 8.84 | 900.33 | 12.91 | 154.47 | 1.80 | 0.37 | 0.38 | 0.03 | 4.05 | 0.05 |
| **IP2** | 21.97 | 8.20 | 1019.00 | 9.24 | 108.00 | 4.24 | 0.53 | 0.38 | 0.02 | 4.90 | 0.04 |
| **IP3** | 23.40 | 8.76 | 700.67 | 12.99 | 155.57 | 10.15 | 0.50 | 0.53 | 0.02 | 7.93 | 0.52 |
| **SMR** | 20.90 | 8.19 | 521.00 | 9.15 | 104.30 | 2.98 | 9.31 | 0.49 | 0.48 | 6.70 | 0.25 |
| **KL** | 16.34 | 7.29 | 591.50 | 7.75 | 79.55 | 4.09 | 0.53 | 1.98 | 0.02 | 7.35 | 0.21 |
| **KL** | 15.50 | 7.74 | 605.67 | 7.62 | 76.50 | 4.17 | 0.37 | 1.92 | 0.02 | 8.60 | 0.19 |

Table S1 Environmental variables per sampling site, used for RDA analysis

T - temperature, pH - measure of acidity or alkalinity, EC - electrical conductivity, DO - dissolved oxygen, DO% - oxygen saturation, BOD - biological oxygen demand, NO3-N - Ammonia-Nitrogen, NH4-N - Ammonium-Nitrogen, PO4 – phosphate ion, N-TOT - total nitrogen, P-TOT - total phosphate

Environmental Science and Pollution Research

Potentially toxic elements in invasive fish species Prussian carp (*Carassius gibelio*) from different freshwater ecosystems and human exposure assessment

Aleksandra Milošković*, Milica Stojković Piperac, Nataša Kojadinović, Milena Radenković, Simona Đuretanović, Dubravka Čerba, Đurađ Milošević, Vladica Simić

Affiliations

**University of Kragujevac, Institute for Information Technologies Kragujevac, Department of Science, Jovana Cvijića bb, 34000 Kragujevac, Serbia**

Aleksandra Milošković

**University of Niš, Faculty of Sciences and Mathematics, Department of Biology and Ecology, Višegradska 33, 18000 Niš, Serbia**

Milica Stojković Piperac and Đurađ Milošević

**University of Kragujevac, Faculty of Science, Institute of Biology and Ecology, Radoja Domanovića 12, 34000 Kragujevac, Serbia**

Nataša Kojadinović, Simona Đuretanović, Milena Radenković, and Vladica Simić

**Josip Juraj Strossmayer University of Osijek, Department of Biology, Cara Hadrijana 8/A, HR-31000 Osijek, Croatia**

Dubravka Čerba

Corresponding author

Correspondence to Aleksandra Milošković.

*Email: aleksandra@uni.kg.ac.rs
